# Supplementary material for: Effect of Peptide Receptor Radionuclide Therapy in Combination with Temozolomide against Tumor Angiogenesis in a Glioblastoma Model
Source: MDPI journal article supplement (doi:10.3390/cancers13195029), 2021-10-08
Supplement: s1 [file s1]

# Supplementary Materials

## Effect of Peptide Receptor Radionuclide Therapy in Combination with Temozolomide against Tumor Angiogenesis in a Glioblastoma Model

Sang Hee Lee <sup>1,2,†</sup>, Ji Young Choi <sup>1,†</sup>, Jae Ho Jung <sup>1</sup>, In Ho Song <sup>1</sup>, Hyun Soo Park <sup>1</sup>, Nunzio Denora <sup>3</sup>, Francesco Leonetti <sup>3</sup>, Sang Eun Kim <sup>1,4,5,\*</sup>, Byung Chul Lee <sup>1,4,\*</sup>

<sup>1</sup> Department of Nuclear Medicine, Seoul National University Bundang Hospital, Seoul National University College of Medicine, Seongnam, 13620, Republic of Korea

<sup>2</sup> Department of Transdisciplinary Studies, Graduate School of Convergence Science and Technology, Seoul National University, Seoul, 08826, Republic of Korea

<sup>3</sup> Department of Pharmacy – Pharmaceutical Sciences, University of Bari “A. Moro”, Bari, 70121, Italy

<sup>4</sup> Center for Nanomolecular Imaging and Innovative Drug Development, Advanced Institutes of Convergence Technology, Suwon, 16229, Republic of Korea

<sup>5</sup> Department of Molecular Medicine and Biopharmaceutical Sciences, Graduate School of Convergence Science and Technology, Seoul National University, Seoul, 08826, Republic of Korea

†Sang Hee Lee (S.H.L.) and Ji Young Choi (J.Y.C.) contributed equally to this study

\*Corresponding authors: Sang Eun Kim (E-mail: [kse@snu.ac.kr](mailto:kse@snu.ac.kr); Tel. No.: +82-31-787-7671) and Byung Chul Lee (E-mail: [leebc@snu.ac.kr](mailto:leebc@snu.ac.kr); Tel. No.: +82-31-787-2956)

### Contents

|                                                                                                 |   |
|-------------------------------------------------------------------------------------------------|---|
| Experimental Section.....                                                                       | 2 |
| Figures S1-S3 .....                                                                             | 3 |
| S1. Comparison of methods for measuring of tumor volume and radionuclide uptake .....           | 3 |
| S2. A preliminary experiment of <sup>188</sup> Re-IDA-D-[c(RGDfK)] <sub>2</sub> treatments..... | 4 |
| S3. Immunofluorescence images with Q-dot 605-D-[c(RGDfK)] <sub>2</sub> .....                    | 5 |

## Experimental Section

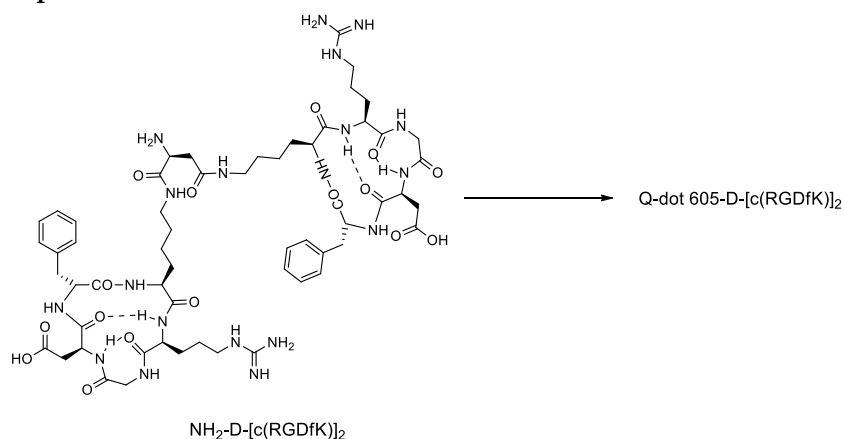

Synthesis of Q-dot 605-D-[c(RGDfK)]<sub>2</sub>. To prepare Q-dot 605-D-[c(RGDfK)]<sub>2</sub>, NH<sub>2</sub>-D-[c(RGDfK)]<sub>2</sub> was prepared with similar method as described in our previous work [13]. NH<sub>2</sub>-D-[c(RGDfK)]<sub>2</sub> (30 pM) was reacted with streptavidin-coated quantum dots (Q-dot 605, Qdot Corp., Hayward, CA) for 3 h at a molar ratio of 1:1 before tumor tissue labeling. After incubation, the reaction mixture was centrifuged to remove the remaining reagents. The obtained particles were washed thoroughly with 1 M tris buffer.

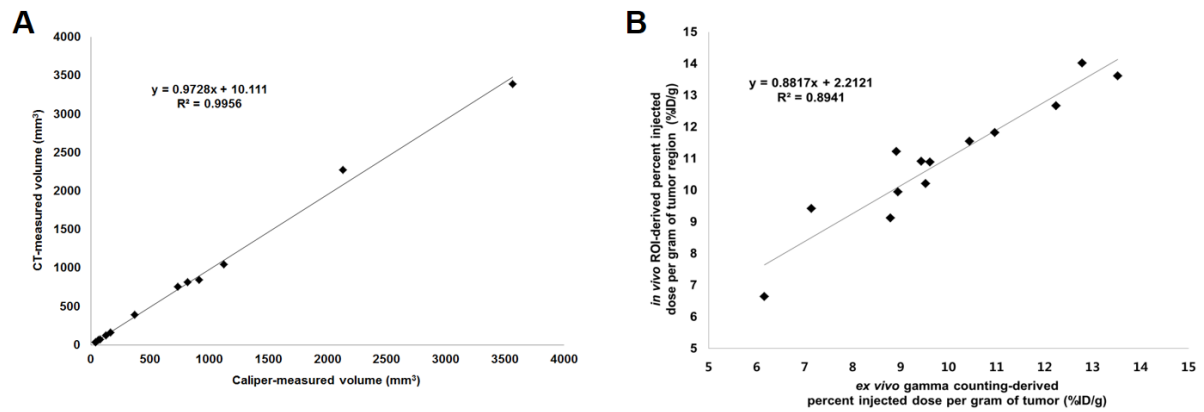

**Figure S1.** Comparison of methods for measuring of tumor volume and radionuclide uptake. Correlation between tumor volume measured on CT images and caliper-measured tumor volume (**A**). Animal CT measurements using an ellipsoidal the region of interest (ROI) correlated well with caliper measurements of the tumor-bearing mice: Comparisons of tumor uptake of <sup>99m</sup>Tc-IDA-D-[c(RGDfK)]<sub>2</sub> analyzed by SPECT imaging and dissected biodistribution (**B**). Measurement of <sup>99m</sup>Tc-IDA-D-[c(RGDfK)]<sub>2</sub> uptake and calculated tumor activity by *in vivo* animal SPECT analysis was compared to the true values, as measured *ex vivo* tumor tissue uptake by gamma conter.

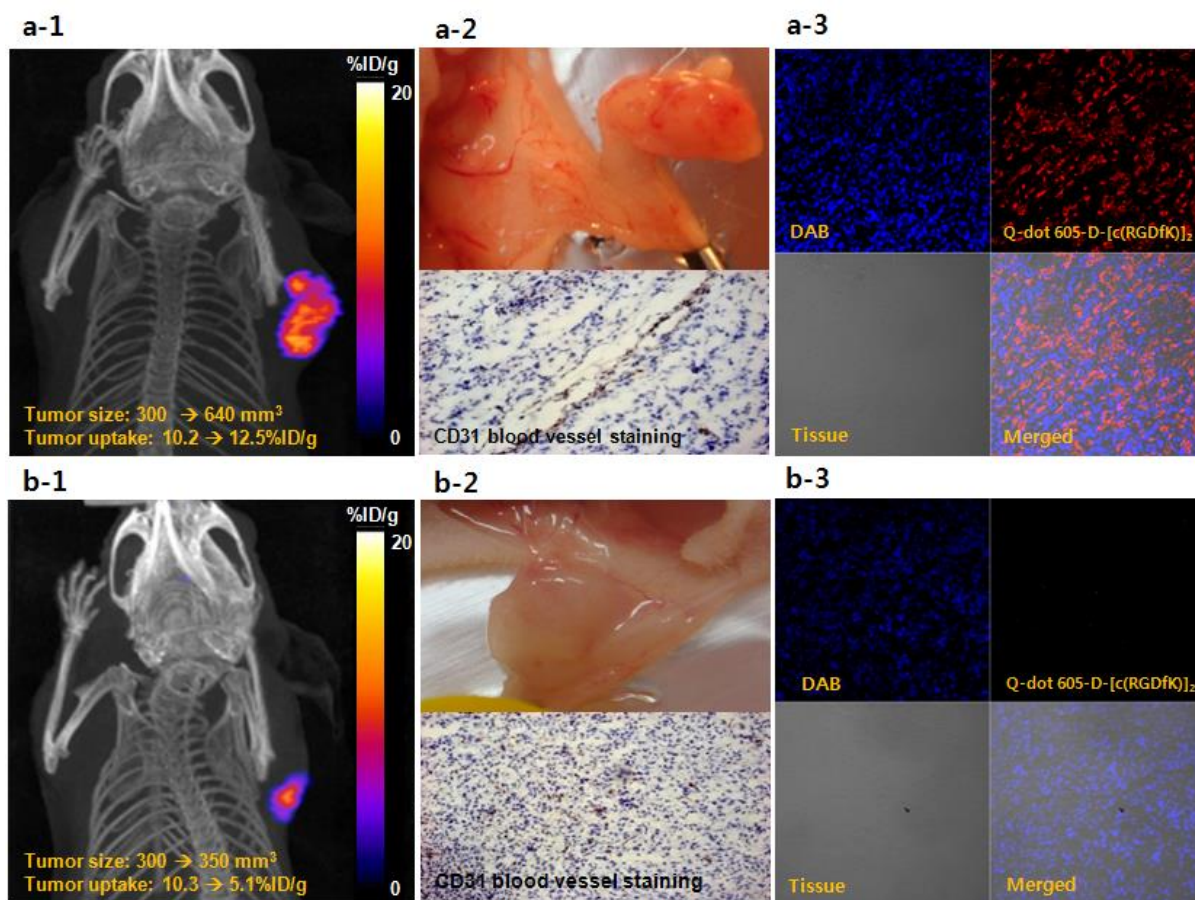

**Figure S2.** A preliminary experiment of  $^{188}\text{Re}$ -IDA-D-[c(RGDfK)]<sub>2</sub> treatments in U87-MG xenografts. After tumor volume reached approximately 300 mm<sup>3</sup>,  $^{188}\text{Re}$ -IDA-D-[c(RGDfK)]<sub>2</sub> or saline was administered intravenously, and at 3 days postinjection thereafter, mice were sacrificed to conduct tissue distribution studies. Images are coronal view from  $^{99\text{m}}\text{Tc}$ -IDA-D-[c(RGDfK)]<sub>2</sub> SPECT at a mid-scan time of 25 min for scan duration of 10 min after 3 days postinjection with saline and 22.2 MBq of  $^{188}\text{Re}$ -IDA-D-[c(RGDfK)]<sub>2</sub>, respectively, and showed converted values of tumor size and % ID/g in each animal (**a-1** and **b-1**). Macroscopic view of excized tumor tissues from each animal and immunohistochemistry for microvessels in each tumor slices using an anti CD31 monoclonal antibody (**a-2** and **b-2**). Nuclei stained with the DAB (blue), fluorescence micrographs of Q-dot-605 D-[c(RGDfK)]<sub>2</sub> (red) stained tumor slices in each animal and microscopy image of each tumor slices (**a-3** and **b-3**).

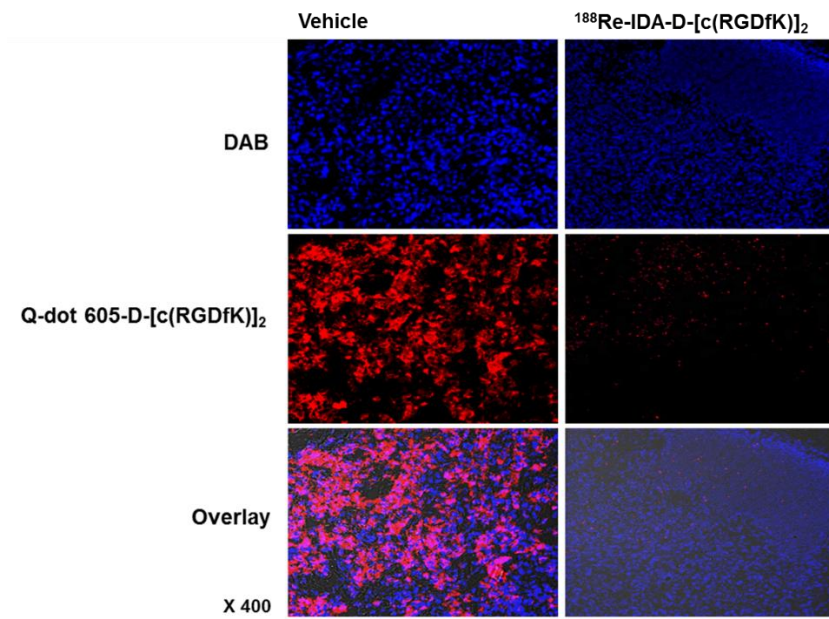

**Figure S3.** Immunofluorescence images with Q-dot 605-D-[c(RGDfK)]<sub>2</sub>
